# Supplementary material
Source: PubMed Central journal article supplement (PMC3634182)
Supplement: supp_btt102_FTFlex_SI_final.pdf [file supp_btt102_FTFlex_SI_final.pdf]

## Supporting Information

### **FTFlex: Accounting for binding site flexibility to improve fragment-based identification of druggable hot spots**

Laurie E. Grove<sup>1</sup>, David R. Hall<sup>2</sup>, Dmitri Beglov<sup>3</sup>, Sandor Vajda<sup>3</sup>, and Dima Kozakov<sup>3</sup>

<sup>1</sup>Department of Sciences, Wentworth Institute of Technology, Boston, MA, USA

<sup>2</sup>Acpharis Inc., Holliston, MA, USA

<sup>3</sup>Structural Bioinformatics Laboratory, Department of Biomedical Engineering, Boston University, Boston, MA, USA

To whom correspondence may be addressed. Email: [midas@bu.edu](mailto:midas@bu.edu)

To whom correspondence may be addressed. Email: [vajda@bu.edu](mailto:vajda@bu.edu)

| <b>Supplemental Information Section</b>                 | <b>Page</b> |
|---------------------------------------------------------|-------------|
| SUPPLEMENTAL METHODS                                    | 3           |
| The FTMap algorithm                                     | 3           |
| The FTFlex algorithm                                    | 3           |
| The FTFlex server workflow                              | 5           |
| SUPPLEMENTAL RESULTS AND ANALYSIS                       | 6           |
| Test set                                                | 6           |
| Analysis of side chain flexibility within the test set  | 6           |
| Impact of side chain flexibility on mapping results     | 7           |
| Examples of FTFlex applied to targets from the test set | 19          |
| SUPPLEMENTAL REFERENCES                                 | 25          |

## SUPPLEMENTAL METHODS

### The FTMap algorithm

The FTmap mapping algorithm has been developed for the identification of ‘hot spots’ of proteins, regions that are most likely to participate in molecular interactions and hence are prime targets for drug design (Brenke et al., 2009). FTFlex is an extension of FTMap, which is also the first step of the FTFlex. FTMap consists of four steps as follows.

(1) *Sampling the protein surface on a grid.* The rotational/translational space of each probe is systematically sampled on a grid around the fixed protein, consisting of 0.8 Å translations and of 500 rotations at each location. The energy function includes a stepwise approximation of the Van der Waals energy with attractive and repulsive contributions, and an electrostatics solvation term based on Poisson-Boltzmann continuum model with the dielectric constants of  $\epsilon = 4$  and  $\epsilon = 80$  for the protein and the solvent, respectively.

(2) *Refinement of probe-protein complexes.* The 2000 complexes are refined by off-grid energy minimization during which the protein atoms are held fixed while the atoms of the probe molecules are free to move. The energy function includes the bonded and van der Waals terms of the CHARMM potential and an electrostatics/solvation term based on the Analytic Continuum Electrostatic (ACE) model, as implemented in CHARMM.

(3) *Clustering of low energy probe poses.* The minimized probe conformations are grouped into clusters using a simple greedy algorithm and a 4 Å RMSD clustering radius. Clusters with less than 10 members are excluded from consideration. The retained clusters are ranked on the basis of their Boltzmann averaged energies. Six clusters with the lowest average energies are retained for each probe.

(4) *Identification of hot spots as consensus sites binding several probe clusters.* To determine the hot spots, FTMap finds consensus sites (CSs), i.e., regions on the protein where clusters of different probes overlap. Therefore the probe clusters are clustered again using the distance between the centers of mass of the cluster centers as the distance measure and 4 Å as the clustering radius. The consensus sites are ranked based on the number of their clusters, with duplicate clusters of the same type also considered in the count. The largest CS defines the most important hot spot, with smaller CSs identifying secondary hot spots that generally also contribute to ligand binding.

### The FTFlex algorithm

The goal of FTFlex is to expand the FTMap algorithm to flexible proteins by accounting for the potential ligand induced conformational changes while preserving the high numerical efficiency of the approach. The feasibility of developing such an algorithm is suggested by a number of observations. First, mapping finds the approximate location of the binding site when applied to unbound protein structures, even in the case of substantial deviations between unbound and bound states. Thus, we can restrict considerations to some neighborhood of the hot spot regions from the initial mapping, which substantially simplifies the conformational search. Second, the major

reason for underestimating the importance of a hot spot when mapping an unbound structure is that the site becomes well formed only in the presence of a bound ligand, changing the conformation of adjacent side chains and increasing the size of the binding site. The opposite case, i.e., when the site is more open in the unbound structure and it closes down on the bound ligand, does not substantially affect the mapping results. The algorithm, identifies the potentially flexible side chains around an initial hot spot, generates their alternative conformers, and adjusts the side chains one-by-one to generate a modified structure with a maximally opened binding site. Steps of the FTFlex algorithms are as follows.

(1) *Identification of the binding site residues to be considered.* First, the ligand binding site is determined from a preliminary mapping calculation. The site with the highest hit rate of probe clusters is taken to be the binding site. Probe clusters within the binding site are used to identify all residues within a 5 Å radius. Next, any residue within 5 Å of the binding site is filtered based on hydrophobicity and cavity size restrictions. A previously developed hydrophobicity potential is used to calculate the hydrophobicity value for each of the residues (Chuang et al., 2008). Only residues with at least a hydrophobicity value of 3.00 are retained. A cavity measure, developed for use in FTMap (Brenke et al., 2009), is also calculated for each residue, and only residues with a cavity measure of at least 60% of the maximum value are retained. For each of the selected residues, possible rotamers are determined from a previously developed rotamer library (Beglov et al., 2012). This library was developed from a set of 4184 protein structures from the PDB by extracting and clustering the end group positions for each of the 18 amino acids using a 1Å clustering radius; glycine and alanine were not included. For each cluster, we define a population value by counting the number of end group positions within the 1Å radius around the cluster center.

(2) *Selecting movable side chains and their rotamers.* To determine the potential rotamers of the selected side chains we perform energy minimization starting from each rotamer in the above rotamer library, to reach local minima (Beglov et al., 2012). The side chains are considered one-by-one in the minimizations, with all others being fixed in their unbound state. The energy minimizations are performed using the CHARMM force field with the Analytical Continuum Electrostatics (ACE) solvation model (Brooks et al., 1983). Final rotamers are then clustered based on a 1 Å endpoint radius. For each cluster the average Boltzmann energy is calculated. Additionally, the population of each cluster is calculated as a sum of the population values of the original end groups (by definition, each representing a cluster of end group positions) that converged to the particular cluster after minimization. Thus, all possible rotamers have an associated energy and population. Side chains that are predicted to have multiple conformers with low energy and/or high population are considered to be movable. An analysis of our data shows that the movable residues are largely restricted to three categories. These movable residues include the bulky aromatics: Tyr, Phe, Trp, and His, the long, flexible amino acids: Lys, Arg, and Met, and Gln, Glu, Asp, and Asn . Hence, to improve efficiency FTFlex only considers rotamers of these residues.

The rotamers generated for the movable residues are filtered based on energy and population restrictions. Based on the analysis of rotamers predicted, a threshold of low energy and high population (greater than 10,000) was established. A threshold of 10,000 was determined based on analysis of the population counts for different residues. Rotamer clusters with populations over 10,000 were found to include all high population clusters, while

eliminating low population rotamers that had a population of less than 10% of the total. To avoid redundancy, rotamers that represent the apo conformation are also identified and ignored by FTFlex. To identify rotamers that are close to the apo conformation, a root mean square deviation (RMSD) value was determined for each residue type by averaging over all RMSDs between the apo-like rotamer and the original residue conformation. Calculation of the RMSD only took into account the atoms of the side chain; backbone atoms were excluded. The resulting average RMSD plus one standard deviation was used as the cutoff of apo-like residues.

(3) *Selection of final rotamers.* Since the goal of FTFlex is to open up binding pockets that may be partially closed in the ligand-free structure, we determine which of the selected rotamers yields the most improvement with regards to creating a larger binding site. This improvement is defined as an increase in the probe cluster count in the ligand binding site based on comparison to the initial mapping results. For this comparison, the rotamers of each movable residue are individually inserted back into the original apo structure. This modified structure is mapped using the FTMap algorithm to determine if there is an increase in the probe cluster count. The rotamer that yields the best improvement is used to generate the final modified structure. In cases where there are multiple movable residues, the rotamers of each residue are tested individually. For each residue the rotamer that yields the most improved mapping results is selected. These select rotamers are then substituted back into the apo structure to yield the modified apo structure. Mapping of the modified apo structure of each target using FTMap provides the final probe cluster count.

#### **The FTFlex server workflow**

The FTFlex server operates using the following steps. First, the protein structure of interest is mapped. The user must select the pdb file of interest and upload this file to the server. FTFlex maps the corresponding structure using the FTMap server. The initial mapping results are then returned to the user. The user must then determine the region on the protein surface that they would like to explore further. FTFlex will only search for flexible residues within the region selected by the user; this region is defined by selecting consensus clusters within the region. FTFlex will then select the residues for consideration within a 5 Å radius of the selected consensus clusters. Only Lys, Arg, Tyr, Phe, Trp, His, Met, Gln, Glu, Asn, and Asp are considered; all other residues are excluded. FTFlex then generates rotamers for each of these residues. Feasible rotamers are filtered based on the following criteria:

1. Only rotamers with a high population and low energy will be considered, as discussed previously.
2. Rotamers with an apo-like conformation as determined by an RMSD value will be excluded.

Each selected rotamer is then inserted back into the PDB one at a time and the structure is mapped again using FTMap. If there is an improvement in the mapping results, judged on the basis of an increase in the number of probe clusters within the binding site, then the rotamer is kept. If not, the rotamer is discarded from consideration. Since all rotamers are individually tested, the time required for this calculation will be highly dependent upon the input structure and the nature of the binding site. After all rotamers have been individually tested, the rotamers that yield the most improvement are substituted back into the PDB file to yield a modified structure, which is mapped and the results are returned to the user. A tutorial on how to use FTFlex can be found at: <http://ftflex.bu.edu/tutorial>.

## SUPPLEMENTAL RESULTS AND ANALYSIS

### Test set

Protein pairs to test the FTFlex algorithm were selected from the Astex non-native docking data set (Verdonk et al., 2008), which includes 65 targets, each represented by a number of structures. First, all targets that did not have an apo structure were discarded, thereby removing 36 targets. Next, targets were chosen that exhibited only very small backbone changes upon ligand binding, reducing the number of targets to 15. An apo and a bound structure were chosen for each of the 15 targets (Table S1). Both the apo and the reference bound structures were mapped after removing all water molecules, ligands, cofactors, and metals, with the exception of the heme cofactor in the structures 1p2y and 1mmv. The protein chains mapped, with the heme groups retained are shown in Table S1. The correlation coefficient between the % contact frequencies for apo and bound structures was calculated to score the similarity of the mapping results for bound and apo structures.

**Table S1.** Targets, PDB files of the apo and bound structures, and chains and heteroatoms used to test the FTFlex algorithm.

| Target                    | PDB file/chain |              |
|---------------------------|----------------|--------------|
|                           | Apo            | Bound        |
| TGT                       | 1pud/A         | 1n2v/A       |
| Carbonic anhydrase II     | 2nxr/A         | 1oq5/A       |
| Cyclin-dependent kinase 2 | 1pw2/A         | 1ke5/A       |
| Dipeptidyl peptidase IV   | 1pfq/A         | 1n1m/A       |
| Acetylcholinesterase      | 1ea5/A         | 1gpk/A       |
| Dihydrofolate reductase   | 1ai9/A         | 1ia1/A       |
| Neuraminidase             | 2b8h/A         | 1l7f/A       |
| nNOS                      | 1zvi/A, heme   | 1mmv/A, heme |
| Chitinase B               | 1e15/A         | 1w1p/A       |
| Carbonic Anhydrase XII    | 1jcz/B         | 1jd0/B       |
| Neuraminidase             | 1nsb/A         | 1vcj/A       |
| Protein Kinase 5          | 1ob3/A         | 1v0p/A       |
| Dihydrofolate reductase   | 1pdb/A         | 1s3v/A       |
| Cytochrome P450cam        | 1phc/A, heme   | 1p2y/A, heme |
| Beta-lactamase            | 2bls/A         | 1l2s/B       |

### Analysis of side chain flexibility within the test set

The structural differences between the pairs of bound and apo structures in the test set are shown in Table S2. These RMSD values are for all residues, as selected by FTFlex, within 5 Å of the ligand binding site and meeting the hydrophobicity and cavity criteria. The first column lists the average RMSD for every residue across the set. To measure the extent of movement of only the residues that have conformational differences between the bound and apo structures, the residues that do not undergo any conformational change were filtered out and the average RMSD was recalculated (Table S2, second column). Some residues were never observed with a different conformation. For instance, Asn, Asp, Met, and Ser always had a similar conformation in both the bound and apo structures. As expected due to their size and larger range of motion, the RMSDs of Trp, Tyr, Lys and His are larger than those of Leu, and Val. It is interesting to note that in the case of Glu and Gln, which are both the same size, Gln has a larger RMSD. However, this result is largely an artifact of the nature of the Gln side chain. The RMSD

calculation does not take into account the spatial symmetry of the C<sub>γ</sub> atom. That is, a Gln side chain with a 180° rotation at C<sub>γ</sub> would be calculated as having a large RMSD even though the overall spacial conformation is identical.

**Table S2.** RMSD for each residue (bound structure vs initial apo structure) within the ligand binding site, number of rotamers predicted by FTFlex and RMSD of each rotamer to the initial apo conformation.

|     | Average RMSD | Average RMSD <sup>a</sup> | Average number of rotamers | Average number of rotamers <sup>b</sup> | RMSD (rotamer vs. apo) |
|-----|--------------|---------------------------|----------------------------|-----------------------------------------|------------------------|
| Asn | 0.398        |                           | 4.67                       | 1.86                                    | 1.74                   |
| Arg | 0.896        | 1.298                     | 10                         | 2.75                                    | 2.75                   |
| Asp | 0.364        |                           | 3.63                       | 1.63                                    | 1.41                   |
| Glu | 0.517        | 0.808                     | 3.5                        | 2.22                                    | 1.61                   |
| Gln | 1.717        | 2.458                     | 6.5                        | 1.67                                    | 2.13                   |
| His | 1.287        | 2.677                     | 1.71                       | 1.4                                     | 2.54                   |
| Ile | 0.796        | 1.847                     | 5.62                       | 1                                       | 0.65                   |
| Leu | 0.448        | 1.040                     | 2.5                        | 1.33                                    | 0.89                   |
| Lys | 2.630        | 3.379                     | 14.5                       | 3.75                                    | 2.1                    |
| Met | 0.469        |                           | 7                          | 2                                       | 1.74                   |
| Phe | 0.525        | 1.628                     | 1.94                       | 1.44                                    | 1.2                    |
| Ser | 0.548        |                           | 2.8                        | 2.2                                     | 1.58                   |
| Thr | 0.693        | 1.436                     | 3.44                       | 1.75                                    | 1.15                   |
| Trp | 0.678        | 4.085                     | 3.78                       | 1.17                                    | 1.29                   |
| Tyr | 0.648        | 3.254                     | 3.64                       | 1.65                                    | 1.89                   |
| Val | 0.411        | 1.086                     | 2.88                       | 1.31                                    | 0.57                   |

<sup>a</sup>For each of the bound-apo pairs, the RMSD of each side chain that moves was calculated and then averaged for each type of amino acid.

<sup>b</sup>The average number of low energy, high population rotamers.

The average number of rotamers generated by FTFlex was also determined for each residue (Table S2). Lys, Arg, and Met, are predicted to have an average of 14.5, 10, and 7 rotamers, respectively. Residues such as Gln, Asn and Ile are intermediate and all other residues are predicted to have an average of 4 rotamers or less. These results are in good agreement with data gathered for experimental ensembles, which invariably list Arg, Lys, Gln, and Met as the most flexible residues (Zhao et al., 2001; Najmanovich et al., 2000). Furthermore, in the case of Ile, Leu, and Val, only one low energy, high population rotamer is predicted by FTFlex and this rotamer is similar to the conformation of the residue in the apo state (Table S2, last column); thus, for our data set FTFlex does not predict any new conformations for Ile, Leu, and Val and these residues are considered to be nonmovable.

### Impact of side chain flexibility on mapping results

Minimizing the number of amino acid residues considered by FTFlex not only enhances the speed of the calculation, but also reduces the probability of false positives; thus certain residues were excluded from the analysis performed by FTFlex. As explained above, Ile, Leu and Val were excluded. Rotamers for Ser and Thr were individually examined and did not yield a significant change in mapping results (see Table S3), thus these rotamers were also excluded from the FTFlex calculation. Thus, FTFlex only considers rotamers of the following residues: Asn, Arg, Asp, Glu, Gln, His, Lys, Met, Phe, Trp and Tyr.

**Table S3.** Rotamer energies and populations, correlation coefficients and probe cluster counts for Ser and Thr rotamers.

| PDB  | Residue | Rotamer Energy (kcal/mol) | Rotamer Population | RMSD to Apo (Å) | Correlation to bound | Probe Clusters |
|------|---------|---------------------------|--------------------|-----------------|----------------------|----------------|
| 1pud |         |                           |                    |                 | 0.75                 | 54             |
| 1pud | SER110  | -1.22                     | 44903              | 0.11            | 0.76                 | 54             |
| 1pud | SER110  | -0.91                     | 67046              | 1.39            | 0.77                 | 51             |
| 1ea5 |         |                           |                    |                 | 0.84                 | 75             |
| 1ea5 | SER122  | -7.26                     | 67046              | 1.17            | 0.88                 | 74             |
| 1ea5 | SER122  | -4.67                     | 44903              | 2.71            | 0.88                 | 75             |
| 1ea5 | SER122  | -0.34                     | 30925              | 2.05            | 0.89                 | 73             |
| 1ea5 | SER200  | -13                       | 67046              | 2.38            | 0.89                 | 76             |
| 1ea5 | SER200  | -6.05                     | 39441              | 2.29            | 0.87                 | 76             |
| 1ea5 | SER200  | -4.05                     | 36387              | 0.4             | 0.89                 | 76             |
| 1ea5 | SER286  | -4.17                     | 39422              | 1.63            | 0.9                  | 75             |
| 1ea5 | SER286  | -2.51                     | 60526              | 0.22            | 0.87                 | 75             |
| 1ea5 | SER286  | -2.07                     | 42926              | 2.54            | 0.9                  | 75             |
| 1pfq |         |                           |                    |                 | 0.46                 | 26             |
| 1pfq | SER630  | -8.15                     | 10648              | 2.08            | 0.46                 | 29             |
| 1pfq | SER630  | -4.92                     | 36387              | 0.84            | 0.39                 | 27             |
| 1phc |         |                           |                    |                 | 0.87                 | 29             |
| 1phc | THR101  | -13.51                    | 62069              | 0.46            | 0.84                 | 29             |
| 1phc | THR101  | -7.88                     | 56641              | 1.59            | 0.83                 | 24             |
| 1phc | THR185  | -7.5                      | 79811              | 0.36            | 0.84                 | 28             |
| 1phc | THR252  | -26.95                    | 63921              | 2.06            | 0.82                 | 29             |
| 1phc | THR252  | -25.59                    | 54787              | 0.45            | 0.84                 | 29             |
| 1ai9 |         |                           |                    |                 | 0.98                 | 81             |
| 1ai9 | THR133  | -9.48                     | 63923              | 0.26            | 0.98                 | 77             |
| 1ai9 | THR133  | -4.03                     | 54787              | 1.9             | 0.97                 | 80             |
| 1ai9 | THR147  | -16.27                    | 67527              | 1.42            | 0.98                 | 79             |
| 1ai9 | THR147  | -9.28                     | 51181              | 0.97            | 0.98                 | 80             |
| 2nxr |         |                           |                    |                 | 0.35                 | 61             |
| 2nxr | THR199  | -5.6                      | 51657              | 0.31            | 0.38                 | 62             |
| 2nxr | THR200  | -5.16                     | 77796              | 0.88            | 0.32                 | 64             |
| 2nxr | THR200  | -3.34                     | 42929              | 2.38            | 0.35                 | 65             |
| 1pdb |         |                           |                    |                 | 0.95                 | 83             |
| 1pdb | THR56   | -18.17                    | 54787              | 2.23            | 0.93                 | 82             |
| 1pdb | THR56   | -17.61                    | 63923              | 0.76            | 0.94                 | 79             |

To assess the agreement of the mapping results of each bound structure and the corresponding apo structure, a



correlation value was calculated (Table S4). The correlation value is a measure of the similarity of nonbonding interactions between probe clusters and binding site residues for two different structures.

**Table S4.** Correlations between the initial apo structure and bound structures (middle column), in addition to the modified and bound structures (last column). In the cases of the apo and bound structures, the mapping results were obtained using FTMap.

| Target                           | Apo structures | Modified structures |
|----------------------------------|----------------|---------------------|
| TGT (1pud)                       | 0.7540         | 0.9000              |
| Carbonic anhydrase II (2nxr)     | 0.3533         | 0.7089              |
| Cyclin-dependent kinase 2 (1pw2) | 0.4803         | 0.6692              |
| Dipeptidyl peptidase IV (1pfq)   | 0.4602         | 0.7506              |
| Acetylcholinesterase (1ea5)      | 0.8433         | 0.8433              |
| Dihydrofolate reductase (1ai9)   | 0.9751         | 0.9751              |
| Neuraminidase (2b8h)             | 0.9427         | 0.9427              |
| NNOS (1zvi)                      | 0.8442         | 0.8533              |
| Chitinase B (1e15)               | 0.7531         | 0.8281              |
| Carbonic Anhydrase XII (1jcz)    | 0.8754         | 0.8388              |
| Neuraminidase (1nsb)             | 0.8527         | 0.8603              |
| Protein Kinase 5 (1ob3)          | 0.8229         | 0.8922              |
| Dihydrofolate reductase (1pdb)   | 0.9495         | 0.9196              |
| Cytochrome P450cam (1phc)        | 0.8654         | 0.8654              |
| Beta-lactamase (2bls)            | 0.8879         | 0.9210              |

Table S4 shows two different correlation values for each of the fifteen targets. These two different correlation values were calculated using the mapping results of the initial apo structure, the bound structure, and the modified apo structure. In the case of the initial apo structure and the bound structure, the correlation values were calculated based on the mapping results obtained from FTMap. The correlation value is improved for eight targets: TGT, CAII, CDK2, dipeptidyl peptidase IV (DPP-IV), chitinase B (chit B), neuraminidase (PDB ID 1nsb), protein kinase 5 (PK5), and beta-lactamase.

An example is shown in Figure S1 for four different target proteins. The plots show the % contact frequency of the probe clusters to each of the ligand binding site residues for three structures: apo, modified apo and bound. The higher the number of nonbonded contacts between a probe cluster and a residue, the higher the % contact frequency; thus the % contact frequency serves as a fingerprint of the mapping results for a given structure. The more similar the % contact frequencies of two structures, the higher the correlation coefficient. In the following analysis, the success of FTFlex versus FTMap is compared. A correlation value was calculated using the mapping results obtained from FTMap for the initial apo structure versus the FTMap results of the bound structure. A second correlation value has been calculated for an FTFlex-generated modified apo structure versus the FTMap-generated mapping results of the bound structure. Thus the comparison of the correlation value between the initial apo-bound and modified apo-bound pairs is a direct assessment of the improvement in mapping obtained using FTFlex versus FTMap. For example, in the case of TGT, the agreement in the % contact frequency for Tyr106 varies significantly between the apo and bound structures (Figure S1a). FTFlex identifies Asn70, Tyr106, and Gln107 as moveable residues and generates a modified structure, which has a higher similarity to the % contact frequency profile of the bound structure. Two other examples are shown: carbonic anhydrase II (CAII) and cyclin-dependent kinase 2 (CDK2) in Figures S1b and S1c, respectively. In these cases, His64 of CAII and Lys33 and Lys89 of CDK2

were found to be moveable by FTFlex. The modified structure generated by FTFlex yielded mapping results in better agreement with those of the bound structure. In the case of dihydrofolate reductase (DHFR) (PDB ID 1ai9) (Figure S1d) there are minimal structural differences between the apo and bound structures. Hence, the mapping results of the bound and apo structures are already in good agreement and FTFlex predicts no new conformations

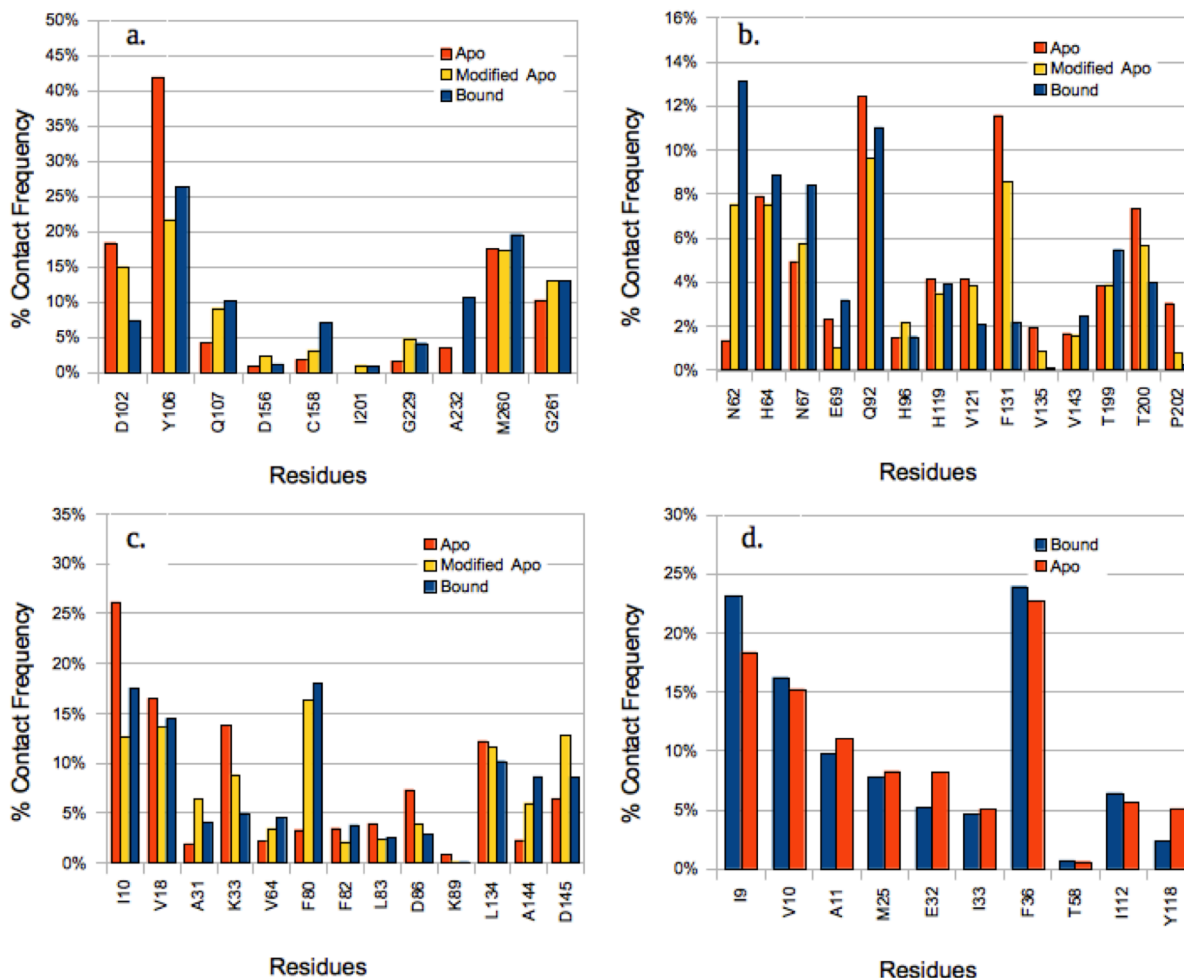

**Figure S1.** Distribution of nonbonded contacts between probe clusters and residues from the mapping results of apo, FTFlex-modified apo, and bound structures. The results are shown for four proteins: TGT (a), CAII (b), CDK2 (c), and DHFR (d).

The correlation values are also illustrated for TGT, CAII and CDK2 in Figures S1a, S1b and S1c, respectively. For these cases the improvement in the correlation value is quite significant, ranging from 0.15 to 0.35. For four cases, the correlation values are already quite high and FTFlex correctly predicts that no residues should be moved. These cases are DHFR (PDB ID 1ai9), neuraminidase (PDB ID 2b8h), NNOS, and cytochrome P459cam. In two cases, carbonic anhydrase XII and DHFR (PDB ID 1pdb), there is a slight worsening of the correlation value by approximately 0.04, but the value is still quite high. In the case of acetylcholinesterase (AChE), while the correlation score is good, it should be noted that the position of Phe330 is significantly different between the apo and bound structure (RMSD of 2.169 Å). While FTFlex predicts a Phe330 conformation that corresponds to the conformation in the bound structure, due to current selection rules this conformation is not selected. This case

warrants further exploration and perhaps a future implementation within FTFlex to allow users increased access to multiple conformations. The individual rotamer results, including RMSDs, and the final mapping results for the 15 targets are shown in Tables S5 and S6, respectively.

**Table S5.** FTFlex predicted rotamers, energies, populations, RMSDs, and mapping results for targets.

| PDB  | Rotamer <sup>a</sup> | Energy<br>(kcal/mol) | Population | RMSD <sup>b</sup> (Å) | RMSD <sup>c</sup> (Å) | RMSD <sup>d</sup> (Å) | Correlation <sup>e</sup> | Probe<br>Clusters |
|------|----------------------|----------------------|------------|-----------------------|-----------------------|-----------------------|--------------------------|-------------------|
| 1pud | None                 |                      |            |                       |                       |                       | 0.7540                   | 54                |
|      | Asn70 (1)            | -2.607               | 18873      | 0.420                 | 0.510                 | 0.811                 | 0.7503                   | 53                |
|      | Asn70 (2)*           | -0.763               | 54937      | 2.235                 |                       | 2.513                 | 0.7824                   | 57                |
|      | Asp102               | -5.643               | 14608      | 1.113                 | 0.183                 | 1.042                 | 0.8055                   | 54                |
|      | Tyr106 (1)           | -9.939               | 43358      | 1.019                 | 5.282                 | 5.818                 | 0.7637                   | 52                |
|      | Tyr106 (2)*          | -0.841               | 27839      | 5.176                 |                       | 0.684                 | 0.8798                   | 58                |
|      | Gln107 (1)           | -3.692               | 57556      | 0.209                 | 2.787                 | 2.657                 | 0.7510                   | 59                |
|      | Gln107 (2)           | -3.526               | 19358      | 3.005                 |                       | 2.472                 | 0.7967                   | 41                |
|      | Gln107 (3)*          | -2.531               | 11004      | 3.192                 |                       | 2.428                 | 0.8433                   | 64                |
|      | Glu235 (1)           | -8.998               | 13752      | 0.651                 | 0.808                 | 1.100                 | 0.7699                   | 53                |
|      | Glu235 (2)           | -1.066               | 26261      | 1.899                 |                       | 2.444                 | 0.7590                   | 52                |
|      | Glu235 (3)           | -0.462               | 103175     | 2.171                 |                       | 2.537                 | 0.7807                   | 52                |
|      | Final structure      |                      |            |                       |                       |                       | 0.9000                   | 64                |
| 2nxr | None                 |                      |            |                       |                       |                       | 0.3533                   | 61                |
|      | His64*               | -6.691               | 38212      | 4.115                 | 3.305                 | 2.169                 | 0.7089                   | 70                |
|      | Gln92 (1)            | -3.009               | 15291      | 1.566                 | 0.167                 | 1.564                 | 0.3255                   | 61                |
|      | Gln92 (2)            | -0.537               | 43247      | 3.430                 |                       | 3.393                 | 0.4404                   | 56                |
|      | Phe131               | -4.480               | 32104      | 0.528                 | 0.258                 | 0.512                 | 0.3851                   | 60                |
|      | Trp209               | -7.175               | 18977      | 0.294                 | 0.188                 | 0.467                 | 0.3275                   | 59                |
|      | Final structure      |                      |            |                       |                       |                       | 0.7089                   | 70                |
| 1pw2 | None                 |                      |            |                       |                       |                       | 0.4803                   | 28                |
|      | Lys33 (1)            | -3.044               | 64053      | 0.375                 | 3.657                 | 3.922                 | 0.4652                   | 27                |
|      | Lys33 (2)*           | -2.763               | 36408      | 2.916                 |                       | 1.517                 | 0.6742                   | 43                |
|      | Lys33 (3)            | -2.454               | 26332      | 2.371                 |                       | 1.867                 | 0.6607                   | 43                |
|      | Phe80                | -3.166               | 67631      | 0.161                 | 0.493                 | 0.630                 | 0.4751                   | 28                |
|      | Phe82                | -4.000               | 49563      | 0.247                 | 0.578                 | 0.595                 | 0.4792                   | 27                |
|      | Gln85                | -7.988               | 37000      | 3.367                 | 2.220                 | 2.393                 | 0.4909                   | 28                |
|      | Lys89 (1)            | -11.832              | 36488      | 2.556                 | 4.103                 | 4.397                 | 0.4614                   | 27                |
|      | Lys89 (2)            | -10.995              | 22279      | 3.623                 |                       | 4.818                 | 0.4628                   | 28                |
|      | Lys89 (3)*           | -10.638              | 10683      | 5.423                 |                       | 5.944                 | 0.5195                   | 34                |
|      | Lys89 (4)            | -9.919               | 12927      | 4.493                 |                       | 1.738                 | 0.5066                   | 34                |
|      | Asp145               | 03.415               | 83180      | 0.823                 | 0.807                 | 0.919                 | 0.4706                   | 24                |
|      | Final structure      |                      |            |                       |                       |                       | 0.6692                   | 46                |
| 1pfq | None                 |                      |            |                       |                       |                       | 0.4602                   | 26                |
|      | Glu205 (1)           | -5.024               | 32974      | 0.439                 | 0.493                 | 0.900                 | 0.4396                   | 24                |
|      | Glu205 (2)           | -2.872               | 74099      | 2.448                 |                       | 2.739                 | 0.4117                   | 25                |
|      | Glu205 (3)           | -2.801               | 50041      | 1.555                 |                       | 1.920                 | 0.4541                   | 25                |
|      | Glu206 (1)           | -29.562              | 87494      | 2.301                 | 0.627                 | 2.078                 | 0.3278                   | 20                |

|      |                 |         |       |       |       |       |        |    |
|------|-----------------|---------|-------|-------|-------|-------|--------|----|
|      | Glu206 (2)      | -12.537 | 69620 | 2.311 |       | 2.253 | 0.4276 | 23 |
|      | Phe357          | -12.771 | 49854 | 0.721 | 0.206 | 0.632 | 0.3938 | 24 |
|      | Tyr547          | -6.016  | 33972 | 0.567 | 1.224 | 1.321 | 0.4235 | 27 |
|      | Trp629*         | -9.044  | 13565 | 3.854 | 4.085 | 0.413 | 0.7271 | 27 |
|      | Trp659          | -14.818 | 13688 | 0.726 | 0.776 | 0.530 | 0.4163 | 25 |
|      | Arg669          | -3.525  | 54738 | 0.331 | 1.210 | 1.277 | 0.4765 | 22 |
|      | Asn710 (1)      | -3.119  | 22060 | 1.961 | 0.861 | 1.703 | 0.4302 | 24 |
|      | Asn710 (2)      | -3.040  | 13997 | 1.259 |       | 1.846 | 0.4163 | 23 |
|      | Asn710 (3)      | -1.207  | 28583 | 2.370 |       | 2.717 | 0.4243 | 23 |
|      | Asn710 (4)*     | -0.471  | 33246 | 3.143 |       | 3.235 | 0.4111 | 29 |
|      | His740          | -12.608 | 14316 | 4.744 | 2.048 | 4.754 | 0.3806 | 25 |
|      | Final structure |         |       |       |       |       | 0.7506 | 27 |
| 1ea5 | None            |         |       |       |       |       | 0.8433 | 75 |
|      | Asp72           | -8.253  | 45977 | 0.991 | 0.437 | 1.307 | 0.8907 | 74 |
|      | Trp84           | -4.818  | 11757 | 0.182 | 0.215 | 0.304 | 0.8834 | 74 |
|      | Asn85 (1)       | -2.890  | 54249 | 0.392 | 0.123 | 0.431 | 0.9028 | 74 |
|      | Asn85 (2)       | -0.607  | 19426 | 2.305 |       | 2.290 | 0.8871 | 73 |
|      | Tyr121          | -3.499  | 24382 | 0.125 | 0.209 | 0.261 | 0.8523 | 73 |
|      | Tyr130          | 0.000   | 44384 | 0.366 | 0.218 | 0.307 | 0.8926 | 75 |
|      | Glu199          | -2.078  | 49088 | 0.211 | 0.085 | 0.195 | 0.8862 | 75 |
|      | Trp279          | -5.305  | 20962 | 0.718 | 0.156 | 0.730 | 0.9002 | 73 |
|      | Phe288          | -3.530  | 64637 | 0.259 | 0.156 | 0.167 | 0.8893 | 74 |
|      | Phe290          | -2.974  | 50411 | 0.147 | 0.216 | 0.193 | 0.8824 | 74 |
|      | Phe330          | -5.965  | 85432 | 1.747 | 2.169 | 0.698 | 0.9595 | 71 |
|      | Phe331          | -4.111  | 67776 | 0.617 | 0.228 | 0.732 | 0.8948 | 72 |
|      | Tyr334 (1)      | -5.742  | 44289 | 0.217 | 0.217 | 0.353 | 0.8893 | 75 |
|      | Tyr334 (2)      | -1.253  | 23943 | 3.349 |       | 3.356 | 0.8968 | 71 |
|      | His440          | -16.298 | 33662 | 0.784 | 0.316 | 0.883 | 0.8770 | 74 |
|      | Tyr442          | -5.199  | 48271 | 0.305 | 0.174 | 0.388 | 0.8855 | 74 |
|      | Final structure |         |       |       |       |       | 0.8433 | 75 |
| 1ai9 | None            |         |       |       |       |       | 0.9751 | 81 |
|      | Met25 (1)       | -6.353  | 11460 | 1.538 | 0.645 | 1.782 | 0.9617 | 80 |
|      | Met25 (2)       | -5.419  | 12678 | 2.303 |       | 2.310 | 0.9072 | 75 |
|      | Glu32 (1)       | -8.680  | 50778 | 0.720 | 0.674 | 1.313 | 0.9623 | 79 |
|      | Glu32 (2)       | -6.296  | 68465 | 1.709 |       | 1.797 | 0.9523 | 79 |
|      | Glu32 (3)       | -5.810  | 37871 | 1.488 |       | 1.112 | 0.9788 | 78 |
|      | Phe36           | -8.105  | 50135 | 0.171 | 0.461 | 0.359 | 0.9825 | 80 |
|      | Tyr118          | -12.736 | 47502 | 0.251 | 0.206 | 0.259 | 0.9809 | 82 |
|      | Final structure |         |       |       |       |       | 0.9751 | 81 |
| 2b8h | None            |         |       |       |       |       | 0.9427 | 31 |

|      |                 |         |        |       |       |       |        |    |
|------|-----------------|---------|--------|-------|-------|-------|--------|----|
| 1zvi | None            |         |        |       |       |       | 0.8442 | 36 |
|      | Glu592 (1)*     | -3.295  | 26201  | 2.421 | 0.570 | 2.136 | 0.8533 | 43 |
|      | Glu592 (2)      | -1.358  | 45830  | 1.726 |       | 1.812 | 0.8434 | 24 |
|      | Glu592 (3)      | -1.207  | 17271  | 2.770 |       | 2.592 | 0.8899 | 36 |
|      | Arg596          | -7.123  | 18065  | 6.098 | 0.493 | 6.385 | 0.8572 | 15 |
|      | Final Structure |         |        |       |       |       | 0.8533 | 43 |
| 1e15 | None            |         |        |       |       |       | 0.7531 | 83 |
|      | Tyr10           | -12.313 | 23667  | 0.455 | 0.196 | 0.315 | 0.7482 | 82 |
|      | Phe12           | -4.522  | 88623  | 0.400 | 0.485 | 0.463 | 0.7609 | 81 |
|      | Asn48           | -3.934  | 64745  | 0.762 | 0.395 | 0.777 | 0.7331 | 83 |
|      | Phe51           | -3.008  | 67629  | 0.182 | 0.256 | 0.250 | 0.8049 | 86 |
|      | Tyr98 (1)       | -2.414  | 27968  | 0.611 | 0.489 | 0.727 | 0.7345 | 83 |
|      | Tyr98 (2)       | -1.579  | 43044  | 6.800 |       | 6.477 | 0.6943 | 81 |
|      | Tyr99           | -5.066  | 50900  | 0.387 | 0.513 | 0.628 | 0.7534 | 83 |
|      | Asp142 (1)*     | -8.541  | 74674  | 1.711 | 0.209 | 1.651 | 0.7551 | 84 |
|      | Asp142 (2)      | -6.279  | 54437  | 0.508 |       | 0.582 | 0.7503 | 84 |
|      | Glu144          | -4.644  | 116250 | 0.680 | 0.350 | 0.434 | 0.8052 | 86 |
|      | Met212 (1)      | -6.296  | 10425  | 1.445 | 0.293 | 1.533 | 0.6149 | 85 |
|      | Met212 (2)*     | -4.235  | 19414  | 1.669 |       | 1.616 | 0.7573 | 87 |
|      | Tyr214 (1)      | -6.543  | 29622  | 0.628 | 0.606 | 0.213 | 0.7697 | 84 |
|      | Asp215*         | -19.576 | 40404  | 2.149 | 0.286 | 1.992 | 0.8297 | 84 |
|      | Arg294 (1)*     | -22.238 | 50917  | 1.593 | 1.530 | 0.912 | 0.7746 | 85 |
|      | Arg294 (2)      | -14.060 | 30002  | 2.589 |       | 2.970 | 0.7442 | 82 |
|      | Trp403          | -4.972  | 17237  | 3.055 | 0.256 | 3.070 | 0.5652 | 79 |
|      | Gln407          | -2.094  | 63080  | 0.302 | 0.120 | 0.281 | 0.7418 | 83 |
|      | Final Structure |         |        |       |       |       | 0.8281 | 91 |
| 1jcz | None            |         |        |       |       |       | 0.8754 | 28 |
|      | His119          | -5.823  | 48023  | 0.219 | 0.178 | 0.213 | 0.8817 | 34 |
|      | Trp209          | -4.488  | 20730  | 0.217 | 0.144 | 0.324 | 0.8672 | 33 |
|      | Asn244 (1)      | -3.864  | 10018  | 0.521 | 0.120 | 0.446 | 0.8481 | 31 |
|      | Asn244 (2)*     | -0.571  | 20509  | 2.230 |       | 2.311 | 0.8388 | 35 |
|      | Final Structure |         |        |       |       |       | 0.8388 | 35 |
| 1nsb | None            |         |        |       |       |       | 0.8527 | 28 |
|      | Arg373 (1)*     | -6.607  | 19463  | 0.962 | 1.152 | 1.445 | 0.8603 | 31 |
|      | Arg373 (2)      | -5.481  | 30952  | 3.112 |       | 2.890 | 0.8383 | 36 |
|      | Arg373 (3)      | -4.242  | 16929  | 2.404 |       | 2.492 | 0.8066 | 35 |
|      | Arg373 (4)      | -3.802  | 23177  | 1.564 |       | 1.259 | 0.8492 | 33 |
|      | Final Structure |         |        |       |       |       | 0.8603 | 31 |
| 1ob3 | None            |         |        |       |       |       | 0.8229 | 49 |
|      | Lys32 (1)*      | -15.827 | 33044  | 1.614 | 2.378 | 1.371 | 0.8693 | 51 |

|                 |         |       |       |       |       |        |    |
|-----------------|---------|-------|-------|-------|-------|--------|----|
| Lys32 (2)       | -13.602 | 51626 | 3.800 |       | 2.050 | 0.8103 | 40 |
| Lys32 (3)       | -10.713 | 18284 | 3.470 |       | 2.043 | 0.8266 | 39 |
| Lys32 (4)       | -10.196 | 28693 | 2.072 |       | 1.617 | 0.7974 | 47 |
| Phe79           | -6.389  | 67631 | 0.278 | 0.341 | 0.290 | 0.8246 | 48 |
| Glu80 (1)       | -10.458 | 93744 | 0.676 | 0.776 | 0.362 | 0.8229 | 46 |
| Glu80 (2)       | -9.790  | 28080 | 1.077 |       | 1.503 | 0.8470 | 50 |
| Glu80 (3)*      | -8.950  | 35290 | 2.922 |       | 3.050 | 0.8410 | 51 |
| His81 (1)       | -9.333  | 26890 | 1.913 | 0.587 | 2.014 | 0.8329 | 50 |
| His81 (2)*      | -4.576  | 14316 | 4.064 |       | 3.960 | 0.7905 | 46 |
| Lys88 (1)       | -6.040  | 12452 | 1.015 | 3.951 | 3.844 | 0.8376 | 52 |
| Lys88 (2)       | -5.197  | 34361 | 0.817 |       | 4.335 | 0.8049 | 53 |
| Lys88 (3)       | -4.182  | 22279 | 2.407 |       | 4.079 | 0.8411 | 50 |
| Lys88 (4)*      | -3.871  | 10683 | 4.171 |       | 4.738 | 0.8527 | 57 |
| Lys127 (1)      | -6.175  | 18819 | 0.829 | 0.384 | 0.913 | 0.8419 | 50 |
| Lys127 (2)      | -6.056  | 17326 | 1.151 |       | 1.410 | 0.8453 | 56 |
| Lys127 (3)*     | -4.874  | 31034 | 1.779 |       | 1.889 | 0.8454 | 52 |
| Gln129 (1)      | -6.687  | 24629 | 2.465 | 2.921 | 3.998 | 0.7823 | 54 |
| Gln129 (2)      | -6.638  | 19506 | 2.217 |       | 1.909 | 0.8751 | 39 |
| Gln129 (3)      | -6.378  | 15692 | 2.899 |       | 4.871 | 0.7154 | 41 |
| Gln129 (4)*     | -6.301  | 16525 | 2.991 |       | 1.383 | 0.8671 | 53 |
| Asn130 (1)      | -4.214  | 14966 | 2.443 | 0.432 | 2.441 | 0.8363 | 51 |
| Asn130 (2)*     | -1.959  | 50788 | 1.674 |       | 1.666 | 0.8299 | 53 |
| Asn130 (3)      | -0.338  | 13459 | 2.431 |       | 2.664 | 0.8596 | 53 |
| Asp143          | -4.271  | 73273 | 0.545 | 0.382 | 0.707 | 0.8326 | 51 |
| Final Structure |         |       |       |       |       | 0.8922 | 55 |
| 1pdb            | None    |       |       |       |       | 0.9495 | 83 |
| Glu30 (1)       | -21.961 | 36674 | 0.426 | 0.274 | 0.404 | 0.9571 | 82 |
| Glu30 (2)       | -19.899 | 47956 | 2.122 |       | 2.104 | 0.9520 | 84 |
| Glu30 (3)       | -12.878 | 26717 | 2.371 |       | 2.319 | 0.9166 | 85 |
| Glu30 (4)       | -11.984 | 20544 | 2.531 |       | 2.484 | 0.9042 | 85 |
| Glu30 (5)*      | -2.016  | 24105 | 3.157 |       | 3.154 | 0.9196 | 87 |
| Phe31           | -14.277 | 49854 | 1.138 | 0.620 | 1.211 | 0.9562 | 82 |
| Tyr33           | -19.387 | 31494 | 0.528 | 0.590 | 0.632 | 0.9562 | 82 |
| Phe34           | -21.245 | 33391 | 0.437 | 0.264 | 0.314 | 0.9613 | 83 |
| Gln35 (1)       | -15.933 | 36831 | 3.007 | 1.724 | 3.172 | 0.9439 | 83 |
| Gln35 (2)       | -15.609 | 17377 | 0.427 |       | 1.861 | 0.9403 | 82 |
| Final Structure |         |       |       |       |       | 0.9196 | 87 |
| 1phc            | None    |       |       |       |       | 0.8654 | 29 |
| Phe87           | -5.866  | 55232 | 0.261 | 1.087 | 0.940 | 0.8335 | 26 |
| Tyr96           | -12.259 | 65972 | 0.822 | 0.956 | 0.777 | 0.8387 | 29 |

|      |                 |         |       |       |       |       |        |    |
|------|-----------------|---------|-------|-------|-------|-------|--------|----|
|      | Phe98           | -7.995  | 72398 | 0.826 | 0.717 | 1.232 | 0.8494 | 24 |
|      | Asp297          | -8.609  | 85637 | 1.132 | 0.340 | 1.185 | 0.8290 | 25 |
|      | Gln322          | -7.733  | 11526 | 0.502 | 0.414 | 0.748 | 0.8467 | 26 |
|      | Final Structure |         |       |       |       |       | 0.8654 | 29 |
| 2bls | None            |         |       |       |       |       | 0.8879 | 66 |
|      | Gln120 (1)      | -17.946 | 21801 | 1.503 | 3.140 | 3.851 | 0.8534 | 66 |
|      | Gln120 (2)      | -16.251 | 12191 | 2.484 |       | 4.119 | 0.8952 | 64 |
|      | Tyr150          | -21.719 | 51526 | 0.841 | 0.238 | 0.798 | 0.6035 | 60 |
|      | Asn152 (1)      | -31.551 | 29984 | 1.260 | 0.433 | 1.171 | 0.8801 | 62 |
|      | Asn152 (2)      | -30.239 | 29605 | 1.845 |       | 2.109 | 0.9042 | 66 |
|      | Asn152 (3)*     | -26.462 | 26113 | 3.005 |       | 2.753 | 0.9210 | 72 |
|      | Final Structure |         |       |       |       |       | 0.9210 | 72 |

<sup>a</sup>Residues that have been selected as movable are listed. The individual rotamers that were selected based on our criteria are designated by the rotamer, ranked by energy, given in parentheses. The asterisk next to some rotamers indicates rotamers that were used to construct the modified apo conformation.

<sup>b</sup>The RMSD is for the atoms of the new rotamer and the corresponding residue in the apo structure.

<sup>c</sup>The RMSD is for the atoms of the original rotamer and the corresponding residue in the bound structure.

<sup>d</sup>The RMSD is for the atoms of the new rotamer and the corresponding residue in the bound structure.

<sup>e</sup>The mapping performance of the apo structure relative to that of the nonapo structure was scored based on the correlation of the nonbonded contacts of the clusters predicted by FTmap.



**Table S6.** Consensus site rankings and number of probe clusters for each bound, apo, and modified apo structure of the fifteen targets.

| Target                        | Probe clusters (Total) | Hot spot ranking (number of probe clusters) |        |        |        |        |       |       |
|-------------------------------|------------------------|---------------------------------------------|--------|--------|--------|--------|-------|-------|
| TGT                           |                        |                                             |        |        |        |        |       |       |
| 1n2v                          | 44                     | 1 (19)                                      | 4 (10) | 6 (8)  | 7 (7)  |        |       |       |
| 1pud                          | 54                     | 1 (32)                                      | 2 (14) | 5 (8)  |        |        |       |       |
| 1pud (modified)               | 64                     | 1 (29)                                      | 2 (17) | 3 (11) | 7 (4)  | 9 (3)  |       |       |
| Carbonic anhydrase II         |                        |                                             |        |        |        |        |       |       |
| 1oq5                          | 58                     | 1 (19)                                      | 3 (14) | 4 (14) | 5 (9)  | 8 (2)  |       |       |
| 2nxr                          | 61                     | 1 (28)                                      | 3 (13) | 4 (10) | 6 (6)  | 7 (3)  | 9 (1) |       |
| 2nxr (modified)               | 70                     | 1 (21)                                      | 3 (16) | 4 (13) | 5 (10) | 6 (9)  | 8 (1) |       |
| Cyclin-dependent kinase 2     |                        |                                             |        |        |        |        |       |       |
| 1ke5                          | 43                     | 3 (14)                                      | 4 (13) | 5 (11) | 8 (3)  | 9 (2)  |       |       |
| 1pw2                          | 28                     | 1 (17)                                      | 3 (11) |        |        |        |       |       |
| 1pw2 (modified)               | 46                     | 1 (17)                                      | 2 (16) | 4 (13) |        |        |       |       |
| Dipeptidyl peptidase IV       |                        |                                             |        |        |        |        |       |       |
| 1n1m                          | 23                     | 2 (15)                                      | 6 (8)  |        |        |        |       |       |
| 1pfq                          | 26                     | 3 (17)                                      | 5 (6)  | 9 (3)  |        |        |       |       |
| 1pfq (modified)               | 27                     | 2 (15)                                      | 8 (4)  | 9 (4)  | 14 (2) | 15 (2) |       |       |
| Acetylcholinesterase          |                        |                                             |        |        |        |        |       |       |
| 1gpk                          | 61                     | 2 (15)                                      | 3 (13) | 4 (12) | 6 (8)  | 7 (7)  | 8 (6) |       |
| 1ea5                          | 75                     | 1 (21)                                      | 2 (15) | 3 (11) | 4 (10) | 7 (7)  | 8 (7) | 9 (4) |
| Dihydrofolate reductase       |                        |                                             |        |        |        |        |       |       |
| 1ia1                          | 81                     | 1 (39)                                      | 2 (18) | 3 (10) | 4 (10) | 5 (4)  |       |       |
| 1ai9                          | 81                     | 1 (29)                                      | 2 (23) | 3 (18) | 4 (11) |        |       |       |
| Neuraminidase                 |                        |                                             |        |        |        |        |       |       |
| 1l7f                          | 40                     | 1 (24)                                      | 2 (16) |        |        |        |       |       |
| 2b8h                          | 31                     | 1 (19)                                      | 5 (8)  | 10 (4) |        |        |       |       |
| nNOS                          |                        |                                             |        |        |        |        |       |       |
| 1mmv                          | 28                     | 3 (15)                                      | 4 (8)  | 8 (5)  |        |        |       |       |
| 1zvi                          | 36                     | 3 (18)                                      | 5 (9)  | 7 (5)  | 10 (4) |        |       |       |
| 1zvi (modified)               | 43                     | 2 (18)                                      | 3 (12) | 6 (7)  | 7 (6)  |        |       |       |
| Chitinase B (1e15)            |                        |                                             |        |        |        |        |       |       |
| 1w1p                          | 89                     | 1 (27)                                      | 2 (22) | 3 (16) | 4 (12) | 5 (6)  | 6 (6) |       |
| 1e15                          | 83                     | 1 (23)                                      | 2 (21) | 3 (16) | 4 (11) | 5 (7)  | 6 (5) |       |
| 1e15 (modified)               | 91                     | 1 (33)                                      | 2 (24) | 3 (13) | 4 (11) | 5 (5)  | 6 (3) | 7 (2) |
| Carbonic Anhydrase XII (1jcz) |                        |                                             |        |        |        |        |       |       |
| 1jd0                          | 36                     | 2 (21)                                      | 4 (8)  | 5 (7)  |        |        |       |       |
| 1jcz                          | 28                     | 3 (16)                                      | 4 (7)  | 7 (5)  |        |        |       |       |

|                           |    |        |        |        |        |        |       |       |
|---------------------------|----|--------|--------|--------|--------|--------|-------|-------|
| 1jcz (modified)           | 35 | 2 (18) | 3 (13) | 5 (4)  |        |        |       |       |
| Neuraminidase             |    |        |        |        |        |        |       |       |
| 1vcj                      | 36 | 2 (21) | 4 (8)  | 5 (7)  |        |        |       |       |
| 1nsb                      | 28 | 3 (16) | 4 (7)  | 7 (5)  |        |        |       |       |
| 1nsb (modified)           | 31 | 1 (26) | 7 (5)  |        |        |        |       |       |
| Protein Kinase 5          |    |        |        |        |        |        |       |       |
| 1v0p                      | 50 | 1 (24) | 3 (12) | 4 (8)  | 6 (6)  |        |       |       |
| 1ob3                      | 49 | 1 (20) | 3 (14) | 4 (11) | 9 (4)  |        |       |       |
| 1ob3 (modified)           | 55 | 1 (23) | 2 (15) | 4 (10) | 5 (7)  |        |       |       |
| Dihydrofolate reductase   |    |        |        |        |        |        |       |       |
| 1s3v                      | 75 | 1 (27) | 2 (11) | 4 (10) | 5 (9)  | 6 (8)  | 8 (6) | 9 (4) |
| 1pdb                      | 83 | 1 (30) | 2 (17) | 3 (15) | 4 (11) | 5 (10) |       |       |
| 1pdb (modified)           | 87 | 1 (31) | 2 (18) | 3 (13) | 4 (8)  | 5 (7)  | 6 (7) | 7 (3) |
| Cytochrome P450cam (1phc) |    |        |        |        |        |        |       |       |
| 1p2y                      | 37 | 1 (22) | 6 (7)  | 7 (7)  | 12 (1) |        |       |       |
| 1phc                      | 29 | 1 (29) |        |        |        |        |       |       |
| Beta-lactamase            |    |        |        |        |        |        |       |       |
| 1l2s                      | 69 | 1 (26) | 2 (14) | 3 (13) | 4 (10) | 5 (6)  |       |       |
| 2bls                      | 66 | 1 (18) | 2 (12) | 3 (12) | 4 (10) | 4 (9)  | 9 (5) |       |
| 2bls (modified)           | 72 | 1 (16) | 2 (16) | 3 (14) | 4 (10) | 5 (8)  | 6 (8) |       |

Of the residues that are considered by FTFlex, two trends were observed. First, in the case of Phe, Trp, Tyr and His, the best mapping results were obtained when the rotamer position aligned with that of the bound structure. For these residues the RMSD between the modified structure and the bound structure is much improved compared to the initial apo and bound structure, 1.81 versus 3.31 Å, respectively (Table S7). On the other hand, for Lys and Arg, there is no apparent improvement in the RMSD (Table S7). These results suggest that Phe, Trp, Tyr and His require specific conformations in the bound state. In the case of Lys and Arg, these residues simply need to be moved out of the binding site to yield improved mapping results. This result is consistent with the observation that Lys and Arg generally collapse into the active site upon crystal formation or are poorly defined in the X-ray crystallographic data (Teague, 2003; Davis et al., 2003).

**Table S7.** Average RMSDs (Å) of residues selected for use in the modified structure.

| Averages           | Apo vs bound | Apo vs modified | Modified vs. Bound |
|--------------------|--------------|-----------------|--------------------|
| Phe, Trp, Tyr, His | 3.31         | 4.3             | 1.81               |
| Lys, Arg           | 2.2          | 2.38            | 2.18               |
| Total              | 1.53         | 1.19            | 2.13               |

## Examples of FTFlex applied to targets from the test set

In the following sections we briefly discuss the results obtained using FTFlex for four different targets from the data set.

### tRNA-guanine transglycosylase.

tRNA-guanine transglycosylase (TGT) catalyzes the exchange of the queuine precursor, preQ1, with the guanine at position 34 in tRNAs specific for Asn, Asp, His, and Tyr (Romier et al., 1996). Mutation of the *tgt* gene in *Shigella flexneri* results in a significant loss of pathogenicity due to the reduced synthesis of the virF protein, which is a key regulatory protein for the expression of virulence (Durand et al., 1994). Hence, TGT is an appealing target for rational drug design against *Shigellae*, the causative agents of dysentery. The structure of *Zymomonas mobilis* TGT, which is identical to that of *S. flexneri* TGT with the exception of a Tyr106 → Phe 106 mutation, has served as the starting point for structure-based drug design. The X-ray crystallographic data of *Z. mobilis* reveal an irregular ( $\beta/\alpha$ )<sub>8</sub>-barrel structure with a C-terminal zinc-binding domain. Soaking crystals of TGT in the presence of PreQ1 results in the binding of PreQ1 in the barrel pocket on the C-terminal face (Romier et al., 1996). PreQ1 intercalates between Tyr106 and Met260, with the side chain of Gln107 oriented towards the purine ring. PreQ1 is also closely positioned next to Asp102, which is the residue believed to act as a nucleophile in the proposed associative mechanism based on site-directed mutagenesis studies (Kittendorf et al., 2001).

Mapping results of the apo structures. The apo structure was taken from the X-ray crystallographic data in PDB file 1pud (1.85 Å resolution) (Romier et al., 1996). Mapping of this structure predicts three consensus sites within the active site (Figure S2, left). The highest ranked consensus site lies at the entrance of the active site in a region of primarily hydrophilic residues. The other two consensus sites (corresponding to the second and eighth ranked sites) are located below CS1 (consensus site 1) and are also relatively solvent-exposed (Figure S2); although they do not overlap with known inhibitors. All three consensus sites were chosen as the cluster around which to search for movable amino acid side chains.

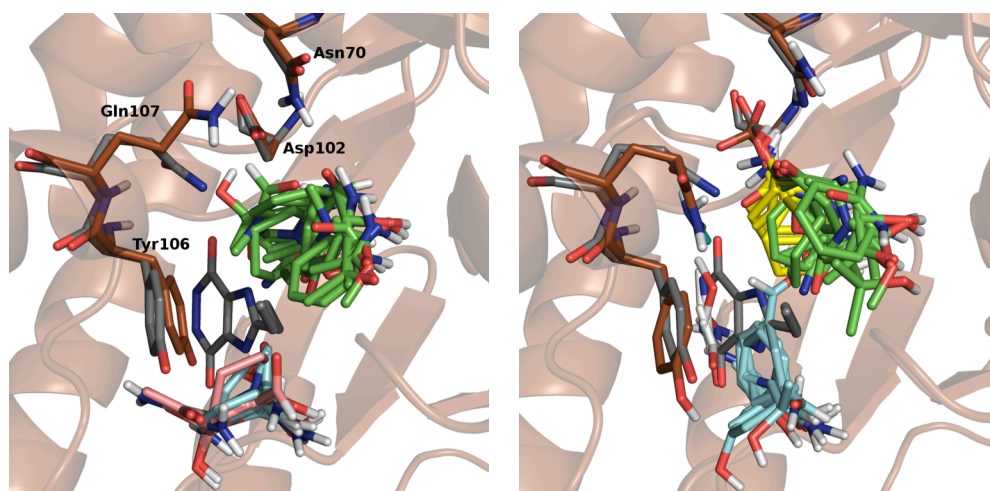

**Figure S2.** Mapping results (colored sticks) are shown for TGT (PDB file 1pud, copper) prior to (left) and after (right) FTFlex. The residues and ligand of the bound structure (PDB file 1n2v) are shown in grey. Residues of interest are shown as sticks and labeled (left).

FTFlex identified Asn70, Tyr106, and Gln107 as the movable residues within the active site of the apo structure (Table S5). The biggest conformational difference involves Tyr106. Between the apo and the modified apo structures Tyr106 has rotated approximately 90 degrees around C $\beta$  orienting the phenol ring towards solvent and resulting in an RMSD of 5.176 Å compared to its original position. Mapping the modified apo structure yields an improvement in the total number of probe clusters from 54 to 64. The highest ranked consensus site is similarly positioned at the entrance of the active site. Inhibitors that take advantage of this binding site have been shown to have nanomolar inhibition (Meyer et al., 2002; Brenk et al., 2004; Stengl et al., 2007). Three additional consensus sites occupy a deeper binding pocket similar to the binding of PreQ1 and known inhibitors, with probe clusters in consensus site 2 (cyan clusters in Figure S2, right) participating in  $\pi$ -stacking with Tyr106.

Comparison of the mapping results of the apo and bound structures. The X-ray crystallographic data of the bound structure came from protein data bank (PDB) file 1n2v (2.1 Å resolution) (Brenk et al., 2003b). The inhibitor of this structure is 2-butyl-5,6-dihydro-1H-imidazo[4,5-D]pyridazine-4,7-dione and has 1a K $_i$  of 83  $\pm$  18  $\mu$ M. In the bound structure, the largest conformational change is the opening up of the PreQ1 binding pocket upon inhibitor binding via the movement of Tyr106 (Table S5 and Figure S2) (Brenk et al., 2003a). The phenol side chain of Tyr106 is oriented towards solvent to facilitate  $\pi$ -stacking interactions between the aromatic ring of phenol and the aromatic heterocyclic ring of the inhibitor. The only other significant movement involves Gln107, which has rotated approximately 180 degrees around C $\gamma$  in the bound structure.

Mapping of the bound structure yields four consensus sites within the active site (Table S6 and Figure S2), in good agreement with those predicted for the modified apo structure. The movement of Tyr106 is key for opening up the buried ligand binding site. The RMSD of Tyr106 in the apo and bound structure improves from 5.282 Å to 0.684 Å for the modified apo structure. To further evaluate the success of FTFlex, correlation coefficients were calculated between the nonbonded contacts of the probe clusters of the bound and apo structures (Table S5 and Figure S1a). For the unaltered apo and bound structures, the correlation coefficient is 0.7540. However, this number significantly improves to 0.9000 when the mapping results of the modified apo structure are compared to those of the bound structure.

### **Carbonic anhydrase II.**

Carbonic anhydrases (CAs) catalyze the Zn(II)-dependent reversible hydration of carbon dioxide into hydrogen carbonate and a proton (Supuran et al., 2003). There are fifteen isozymes known in vertebrates, all with different physiological roles. Some are localized in the cytosol or mitochondria, while others are membrane-bound with extra-cellular active site domains. Although there are some variations in the amino acid sequence, the active site for all CA isozymes are quite similar, with the catalytic Zn occupying a deep conical site (Fisher et al., 2007). The Zn<sup>2+</sup> ion is coordinated by three His residues and a hydroxide ion. The catalysis of the hydration and dehydration of CA II occurs in two distinct steps and requires a proton transfer from solvent, facilitated by His64 (Nair and Christianson, 1991), which is located approximately 7.5 Å away from the catalytic Zn (Fisher et al., 2007). Thus His64 can adopt an inward (directed towards the active site) or outward (directed away from the active site)

conformation. Carbonic anhydrases (CAs) are widely targeted in the prevention of many diseases, including glaucoma, hypertension, diabetes (Scozzafava et al., 2004); some evidence suggests that CAs may also be a potential target for cancer (Cecchi et al., 2004). Inhibitors of CA predominantly are anchored to the zinc ion through sulfonamide groups (Abbate et al., 2002). Unfortunately, the lack of tissue-selective and isozyme-specific inhibition of CAs results in unwanted side effects; the design of isozyme-specific inhibitors remains a critical challenge.

*Mapping results of the apo structures.* The apo structure of CA II was taken from PDB file 2nxr (1.70 Å resolution) (Fisher et al., 2007) and mapped. The mapping results are shown in Figure S3 (left) and Tables S5 and S6. There are a total of 61 probe clusters found with the active site; 38 of those probe clusters correspond to the region of sulfonamide binding near the zinc ion (green and yellow sticks). An additional large binding site is also identified near Ile91, Gln92, Gln69, and Asn67 (purple sticks).

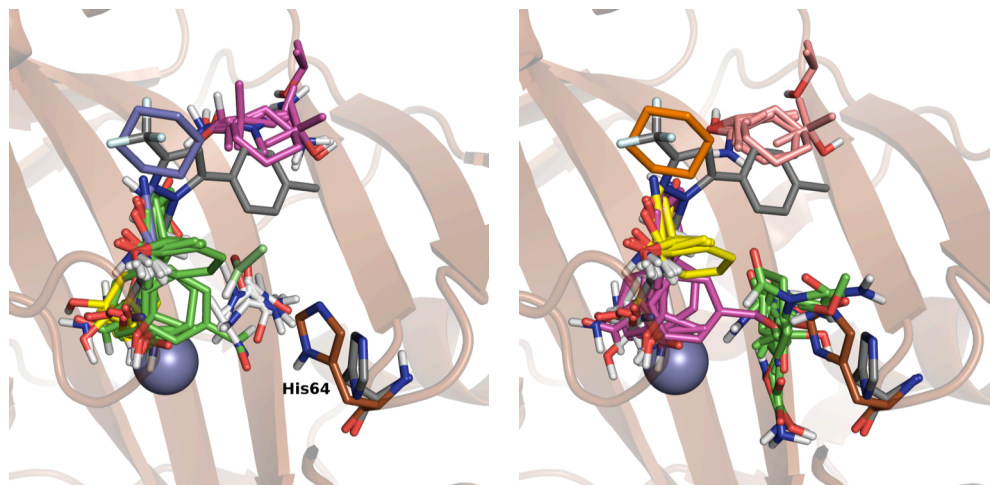

**Figure S3.** Mapping results (colored sticks) are shown for CA II (PDB file 2nxr, copper) prior to (left) and after (right) FTFlex. The residues and ligand of the bound structure (PDB file 1oq5) are shown in grey. Residues of interest are shown as sticks and labeled (left).

FTFlex identified His64 as the only flexible side chain. In the modified apo structure, His64 is oriented away from the active site, with an RMSD of 4.115 Å from its original position (Table S5). This movement creates a new hot spot as shown in Figure S3 (right, green sticks). This new hot spot is flanked by Tyr7, Asn62, His64, His94 and Thr200. Indeed, this new site is known to be a key binding site for recently discovered nanomolar inhibitors of CA II and CA IV (Vernier et al., 2010). The hot spots identified for the unmodified structure were also conserved in the mapping of the modified structure.

*Comparison of the mapping results of the apo and bound structures.* The bound structure of CA II was also mapped in the absence of its ligand. In this case the structure was taken from PDB file 1oq5 (1.50 Å resolution) (Weber et al., 2004). The inhibitor in this structure is celecoxib, which has a  $K_i$  of 21 nM and is also a cyclooxygenase-2 (COX-

2) specific inhibitor. The mapping results of the bound structure yield a total of 64 probe clusters within the active site. The majority of these probe clusters are found in the vicinity of the zinc ion (39 probe clusters). Two other hot spots are identified. One corresponds to the hot spot shown in Figure S3 (right) as pink sticks with 9 probe clusters. The other is the hot spot opened up by the movement of His64.

The correlation coefficient calculated for the bound and initial apo structure is 0.3533, but is a much improved value of 0.7089 for the modified and bound structures (Table S5 and Figure S1b). The RMSD of His64 has improved from 4.115 for the apo versus bound structure to 2.169 Å for the modified versus bound structure. Thus, the RMSD is still quite large, but the structure output by FTFlex is in significantly better agreement with the conformation and the mapping results of the bound structure.

### **Cyclin-dependent kinase 2.**

The cyclin-dependent kinases (CDK) play a key role in cell cycle regulation. Cyclin-dependent kinase 2 (CDK2) in particular is involved in the regulation of the G1 phase and mitosis (Morgan, 1997). Activation of CDK2 requires the binding of a cyclin (cyclin E in the G1 phase and cyclin B during mitosis), which entails minimal activity, as well as phosphorylation of a threonine residue, which yields full activity (Pavletich, 1999). The binding of cyclin and a ligand to CDK2 results in large conformational changes to yield the fully aligned catalytic triad, namely Lys33, Glu51, and Asp145, within the active site (Wu et al., 2003). The catalytic triad lies in a cleft between the N-terminus  $\beta$ -sheet region and the C-terminus  $\alpha$ -helical domain. This is the same pocket in which ATP binds, with the triphosphodiester oriented towards the catalytic triad (Schulze-Gahmen et al., 1996). In the inactive state (non-cyclin bound), helix 1 is flipped, exposing Glu51 to the solvent; however, much of the ATP-binding pocket remains intact. This binding pocket has attracted interest in the use of protein kinase inhibitors as drugs against cancer and similar proliferative diseases due to the observation that the activity of kinases is deregulated in many tumor cells (Helal et al., 2009; Bramson et al., 2001).

*Mapping results of the apo structures.* The apo structure was taken from PDB file 1pw2 (1.95 Å resolution) (Wu et al., 2003). Mapping of this structure yields two consensus sites with a total probe cluster count of 28 (Figure S4, left and Tables S5 and S6). The highest ranked consensus site is shown as green and lies in the adenosine binding pocket. Above this site is a second consensus site which corresponds to the phosphodiester binding site of ATP. These two sites were chosen as the cluster around which to search for movable amino acid side chains.

FTFlex identified Lys33 and Lys89 as flexible binding site residues. The rotamer selected for Lys33 has moved out of the binding pocket; a 2.916 Å RMSD from the initial position of the residue. In the case of the selected rotamer of Lys89, the RMSD between the final selected rotamer and the initial position in the apo structure is quite large (5.423 Å), with the side chain rotating approximately 180 degrees around C $\beta$ .

The modified apo structure was mapped and the results are shown in Table S6 and Figure S4. The highest ranked consensus site (green sticks) has now moved to occupy the position originally occupied by Lys33; this is also at the apex of the catalytic triad. Similarly, the third highest consensus site (purple sticks) occupies the site originally

occupied by Lys89. A consensus site is also found in the phosphodiester binding region as was observed for the original apo structure. Most notably, the improvement in the number of probe clusters (Table S5) is approximately additive in this case. By itself, movement of Lys33 yielded an additional 16 probe clusters while movement of Lys89 resulted in 6 additional probe clusters. Inserting both new rotamers into the final structure yields an additional 24 probe clusters.

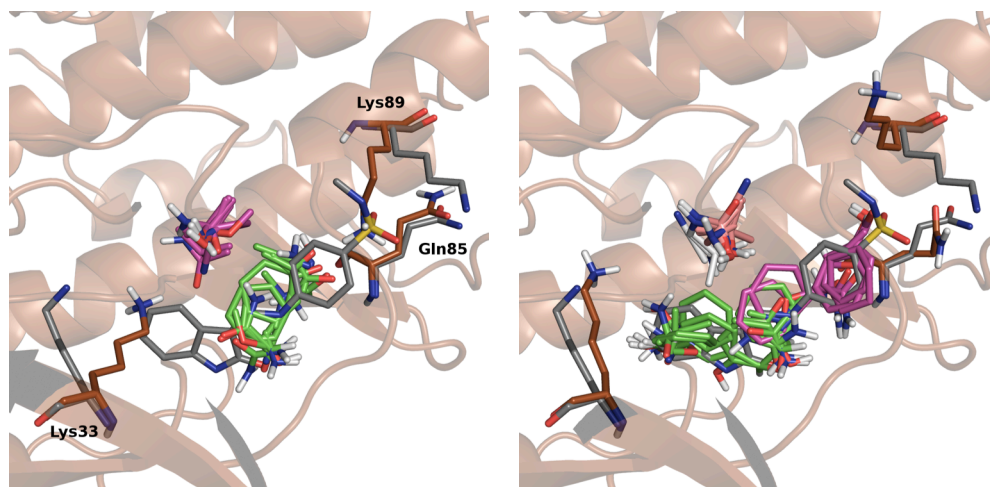

**Figure S4.** Mapping results (colored sticks) are shown for CDK2 (PDB file 1pw2, copper) prior to (left) and after (right) FTFlex. The residues and ligand of the bound structure (PDB file 1ke5) are shown in grey. Residues of interest are shown as sticks and labeled (left).

*Comparison of the mapping results of the apo and bound structures.* As mentioned above, while the CDK2 enzyme undergoes substantial conformational movement upon cyclin binding, the ATP binding site remains accessible in both states (Schulze-Gahmen et al., 1996). Hence, inhibitors have been targeted to lock CDK2 in the inactive state. The bound structure considered in this case is that of PDB file 1ke5 with inhibitor N-methyl-4-[2-oxo-1,2-dihydro-3H-indol-3-ylidene) methyl] amino benzenesulfonamide (labeled and referred to as LS1 for the remainder of this discussion); inhibitor LS1 exhibits an LC50 of 560 nM (Bramson et al., 2001). In this structure, the indolin-2-one ring sits in proximity to Lys33 and Asp145 of the catalytic triad, while the sulfonamide end binds closer to the surface of the cleft, with hydrogen bond contacts to Lys89 and the backbone amide of Asp86.

Mapping results of 1ke5 reveal 4 main hot spots within the binding cleft. The consensus sites determined for 1ke5 agree well with those determined for the final modified structure of 1pw2. The deep binding pocket near the catalytic triad (corresponds to the green sticks in Figure S4, right) and the phosphodiester (corresponds to the magenta sticks in Figure S4, right) binding sites are both identified. Notably, the mapping results for the final apo structure align very well with the ligand from the bound structure. This observation is supported by the improvement in the correlation from 0.4803 for the initial apo structure to 0.6603 for the final structure (Figure S1c).

As noted above, both Lys33 and Lys89 are important for opening up the binding site of the apo structure. In the case of Lys33, the RMSD between the initial apo and bound structures is 3.657 Å. The RMSD of Lys33 between bound and apo structure has decreased to 1.517 Å for the rotamer used in the final structure. In the case of Lys89, the RMSD between the bound and apo was even larger at 4.103 Å; however, the RMSD of the new rotamer predicted by FTFlex is 5.944 Å. In this case, selecting a rotamer that allowed for the side chain to be removed from the binding site gave sufficient results.

### **Dihydrofolate reductase**

Dihydrofolate reductase (DHFR) catalyzes the reduction of dihydrofolic acid to tetrahydrofolic acid, using NADPH as the electron donor. DHFR is an important target for a number of organisms, including bacterial and fungal species (De Pauw and Meunier, 1999). In particular, life-threatening disease caused by organisms such as *Candida albicans*, is now relatively common among patients with compromised immune systems (Barnes, 2008). The structure of DHFR from *C. albicans* reveals a nine-stranded  $\beta$ -sheet core, flanked by  $\alpha$ -helices on either side. Inhibitors are known to bind deep in the folic acid binding pocket, which is wider in the DHFR structure of *C. albicans* relative to the structure from humans (Whitlow et al., 2001). NADPH binds next to the folic acid binding pocket, with its nicotinamide ring positioned below the hydroxypteridin ring of folic acid.

Mapping results of the apo structures. The apo structure was taken X-ray crystallographic data from PDB file 1ai9 (resolution of 1.85 Å) (Whitlow et al., 2001). Mapping calculations revealed a total of 81 probe clusters within the folic acid/NADPH binding pocket (Figure S5). Of these probe clusters, the first and second highest count consensus site corresponded to the binding region of the hydropteridin ring of folate and the nicotinamide ring of NADPH. Indeed, inhibitors that took advantage of both the folate and NADPH binding pockets were found to more selective towards *C. Albicans* (Whitlow et al., 2001). The third and fourth consensus sites correspond to the binding sites of the ribose ring of NADPH and the phenyl ring of folate, respectively. FTFlex identified fourteen amino acids in the vicinity of the probe clusters. Of these amino acids, no rotamers were found to improve the mapping results. Hence, the initial mapping results were not improved by FTFlex.

Comparison of the mapping results of the apo and bound structures. The bound structure of DHFR from *C. Albicans* was taken from PDB file 1ia1 (1.70 Å resolution) (Whitlow et al., 2001). This structure includes both NADPH and the inhibitor, 5-phenylsulfanyl-2,4-quinazolinediamine, which has an  $IC_{50}$  of 0.034  $\mu$ M. The largest differences between the binding site of the bound and apo structures are between Met25 and Glu32, with RMSDs of 0.645 and 0.674 Å, respectively. The mapping results of 1ia1 yield five consensus sites within the binding pocket for a total of 80 probe clusters, which is in good agreement to the number found for the apo structure. The first and third consensus sites overlap with the diaminoquinazoline ring system of the inhibitor, while the fourth consensus site corresponds to the phenyl ring. The consensus sites found for the bound structure are in good agreement with those determined for the apo structure, with a correlation of 0.9751 (Figure S1d). The high correlation indicates a high degree of similarity between the binding sites of the apo and bound structures, indicating that no conformational changes



are needed for the apo structure. Indeed, this result supports our findings for the apo structure, in which no movable amino acids were found by FTFlex.

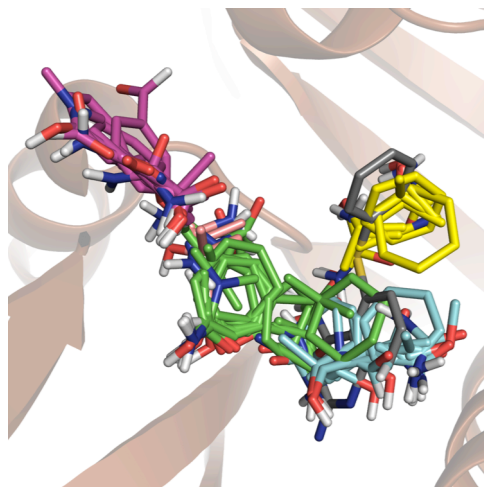

**Figure S5.** Mapping results (colored sticks) are shown for DHFR (PDB file 1ai9, copper). The ligand of the bound structure (PDB file 1ia1) is shown in grey.

#### SUPPLEMENTAL REFERENCES

- Abbate, F. *et al.* (2002) Nonaromatic sulfonamide group as an ideal anchor for potent human carbonic anhydrase inhibitors: Role of hydrogen-bonding networks in ligand binding and drug design. *J. Med. Chem.*, **45**, 3583-3587.
- Barnes, R. A. (2008) Early diagnosis of fungal infection in immunocompromised patients. *J. Antimicrob. Chemother.*, 61(suppl 1), i3-i6.
- Beglov, D., *et al.* (2012) Minimal ensembles of side chain conformers for modeling protein-protein interactions, *Proteins*, **80**, 591-601.
- Bramson, H. N. *et al.* (2001) Oxindole-based inhibitors of cyclin-dependent kinase 2 (CDK2): Design, synthesis, enzymatic activities, and x-ray crystallographic analysis. *J. Med. Chem.*, **44**, 4339-4358.
- Brenk, R. *et al.* (2003) Flexible adaptations in the structure of the tRNA-modifying enzyme tRNA-guanine transglycosylase and their implications for substrate selectivity, reaction mechanism and structure-based drug design. *ChemBioChem*, **4**, 1066-1077.
- Brenk, R. *et al.* (2003) Virtual screening for submicromolar leads of RNA-guanine transglycosylase based on a new unexpected binding mode detected by crystal structure analysis. *J. Med. Chem.*, **46**, 1133-1143.
- Brenk, R. *et al.* (2004) Crystallographic study of inhibitors of tRNA-guanine transglycosylase suggests a new structure-based pharmacophore for virtual screening. *J. Mol. Biol.*, **338**, 55-75.
- Brenke, R. *et al.* (2009) Fragment-based identification of druggable 'hot spots' of proteins using Fourier domain correlation techniques. *Bioinformatics*, **25**, 621-627.
- Brooks, B. R. *et al.* (1983) Charmm: A program for macromolecular energy, minimization, and dynamics calculations. *J. Comp. Chem.*, **4**, 187-217.

- Cecchi, A. *et al.* (2004) Carbonic anhydrase inhibitors: synthesis and inhibition of cytosolic/tumor-associated carbonic anhydrase isozymes I, II, and IX with sulfonamides derived from 4- isothiocyanato-benzolamide. *Bioorg. Med. Chem. Lett.*, **14**, 5775 - 5780.
- Chuang, G.-Y. *et al.* (2008) Dars (decoys as the reference state) potentials for protein-protein docking. *Biophys. J.*, **95**, 4217-4227.
- Chuang, G.-Y. *et al.* (2010) Domain motion and inter-domain hot spots in a multi-domain enzyme. *Protein Sci.*, **19**, 1662-1672.
- Davis, A. M. *et al.* (2003) Application and limitations of X-ray crystallographic data in structure-based ligand and drug design. *Angew. Chem., Int. Ed.*, **42**, 2718-2736.
- De Pauw, B. E. and Meunier, F. (1999) The challenge of invasive fungal infection. *Chemotherapy (Basel, Switz.)*, **45**, 1-14.
- Durand, J. M. B. *et al.* (1994) Transfer rna modification, temperature and DNA superhelicity have a common target in the regulatory network of the virulence of *shigella flexneri*: The expression of the virF gene. *Mol. Microbiol.*, **35**, 924-935.
- Fisher, S. Z. *et al.* (2007) Speeding up proton transfer in a fast enzyme: Kinetic and crystallographic studies on the effect of hydrophobic amino acid substitutions in the active site of human carbonic anhydrase II. *Biochemistry*, **46**, 3803-3813.
- Hall, D. H. *et al.* (2011) Robust identification of binding hot spots using continuum electrostatics: Application to hen egg-white lysozyme. *J. Am. Chem. Soc.*, **133**, 20668-20671.
- Helal, C. J. *et al.* (2009) Potent and cellularly active 4-aminoimidazole inhibitors of cyclin-dependent kinase 5/p25 for the treatment of Alzheimer's disease. *Bioorg. Med. Chem.*, **19**, 5703-5707.
- Kittendorf, J. D. *et al.* (2001) tRNA-guanine transglycosylase from *Escherichia coli*: Molecular mechanism and role of aspartate 89. *Biochemistry*, **40**, 14123-14133.
- Kozakov, D. *et al.* (2011) Structural conservation of druggable hot spots in protein-protein interfaces. *Proc. Nat. Acad. Sci.*, **108**, 13528-13533.
- Landon, M. *et al.* (2008) Novel druggable hot spots in avian influenza neuraminidase H5N1 revealed by computational solvent mapping of a reduced and representative receptor ensemble. *Chem Biol Drug Des.*, **71**, 106-116.
- Ma, B. *et al.* (2002) Multiple diverse ligands binding at a single protein site: A matter of pre-existing populations. *Protein Sci.*, **11**, 184-197.
- Meyer, E. A. *et al.* (2002) De novo design, synthesis, and in vitro evaluation of inhibitors for prokaryotic tRNA-guanine transglycosylase: A dramatic sulfur effect on binding affinity. *ChemBioChem*, **3**, 250-253.
- Morgan, D. O. (1997) Cyclin-dependent kinases: Engines, clocks, and microprocessors. *Annu. Rev. Cell Dev. Biol.*, **13**, 261-291.
- Nair, S. K. and Christianson, D. W. (1991) Unexpected pH-dependent conformation of His-64, the proton shuttle of carbonic anhydrase II. *J. Am. Chem. Soc.*, **113**, 9455-9458.

- Najmanovich, R. *et al.* (2000) Side-chain flexibility in proteins upon ligand binding. *Proteins: Struct., Funct., and Genet.*, **39**, 261-268.
- Pavletich, N. P. (1999) Mechanisms of cyclin-dependent kinase regulation: structures of CDKs, their cyclin activators, and CIP and INK4 inhibitors. *J. Mol. Biol.*, **287**, 821 - 828.
- Romier, C. *et al.* (1996) Crystal structure of tRNA-guanine transglycosylase RNA modification by base exchange. *EMBO J.*, **15**, 2850-2857.
- Schulze-Gahmen, U. *et al.* (1996) High-resolution crystal structures of human cyclin-dependent kinase 2 with and without ATP: Bound waters and natural ligand as guides for inhibitor design. *J. Med. Chem.*, **39**, 4540-4546.
- Stengl, B. *et al.* (2007) Crystal structures of tRNA-guanine transglycosylase (TGT) in complex with novel and potent inhibitors unravel pronounced induced-fit adaptations and suggest dimer formation upon substrate binding. *J. Mol. Biol.*, **370**, 492-511.
- Teague, S. J. (2003) Implications of protein flexibility for drug discovery. *Nat. Rev. Drug Discovery*, **2**, 527-541.
- Scozzafava, A. *et al.* (2004) Modulation of carbonic anhydrase activity and its applications in therapy. *Expert Opin. Ther. Pat.*, **14**, 667-702.
- Stengl, B. *et al.* (2007) Crystal structures of tRNA-guanine transglycosylase (TGT) in complex with novel and potent inhibitors unravel pronounced induced-fit adaptations and suggest dimer formation upon substrate binding. *J. Mol. Biol.*, **370**, 492-511.
- Supuran, C. T. *et al.* (2003) Carbonic anhydrase inhibitors. *Med. Res. Rev.*, **23**, 146-189.
- Verdonk, M. L. *et al.* (2008) Protein-ligand docking against non-native protein conformers. *J. Chem. Inf. Model.*, **48**, 2214-2225.
- Vernier, W. *et al.* (2010) Thioether benzenesulfonamide inhibitors of carbonic anhydrases II and IV: Structure-based drug design, synthesis, and biological evaluation. *Bioorg. Med. Chem.*, **18**, 3307 - 3319.
- Weber, A. *et al.* (2004) Unexpected nanomolar inhibition of carbonic anhydrase by COX-2-selective celecoxib: New pharmacological opportunities due to related binding site recognition. *J. Med. Chem.*, **47**, 550-557.
- Whitlow, M. *et al.* (2001) X-ray crystal structures of *Candida albicans* dihydrofolate reductase: High resolution ternary complexes in which the dihydronicotinamide moiety of NADPH is displaced by an inhibitor. *J. Med. Chem.*, **44**, 2928-2932.
- Zhao, S. *et al.* (2001) Analysis of a data set of paired uncomplexed protein structures: New metrics for side-chain flexibility and model evaluation. *Proteins: Struct., Funct., and Genet.*, **43**, 271-279.
